# Supplementary material for: A highly stable Zn coordination polymer exhibiting pH-dependent fluorescence and as a visually ratiometric and on–off fluorescent sensor
Source: Royal Society of Chemistry journal article supplement (doi:10.1039/d1ce00705j), 2021-01-01
Supplement: d1ce00705j1.pdf [file d1ce00705j1.pdf]

## Supporting Information

**A highly stable Zn coordination polymer exhibiting pH-dependent fluorescence and as a visually ratiometric and on-off fluorescence sensor**

**Po-Min Chuang and Jing-Yun Wu\***

Department of Applied Chemistry, National Chi Nan University, Nantou 545, Taiwan.

E-mail: [jyunwu@ncnu.edu.tw](mailto:jyunwu@ncnu.edu.tw)

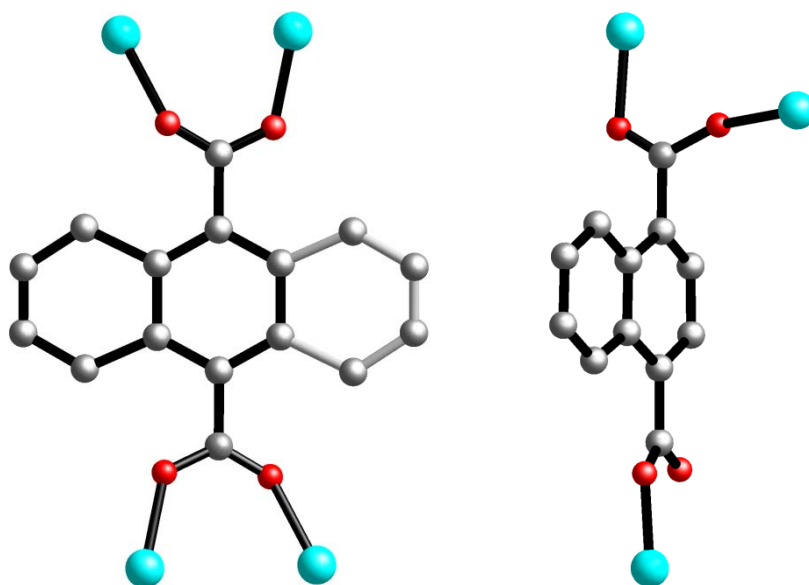

**Fig. S1** Coordination modes of 1,4-ndc<sup>2-</sup> ligand in **1**: (left) the  $\mu_4$ -bridging mode with two carboxylate groups both in a bidentate syn,syn-bridging mode; (right) the  $\mu_3$ -bridging mode with one carboxylate group in a monodentate mode and the other one in a bidentate syn,anti-bridging mode.

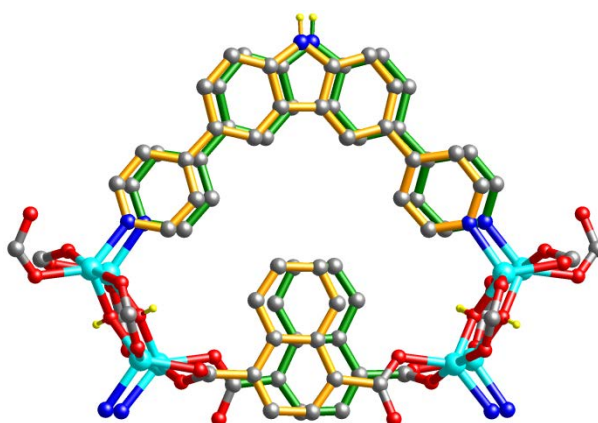

**Fig. S2** Perspective view of intramolecular  $\pi$ - $\pi$  interactions between two neighboring carbazole moieties and between two neighboring naphthalene moieties in **1**.

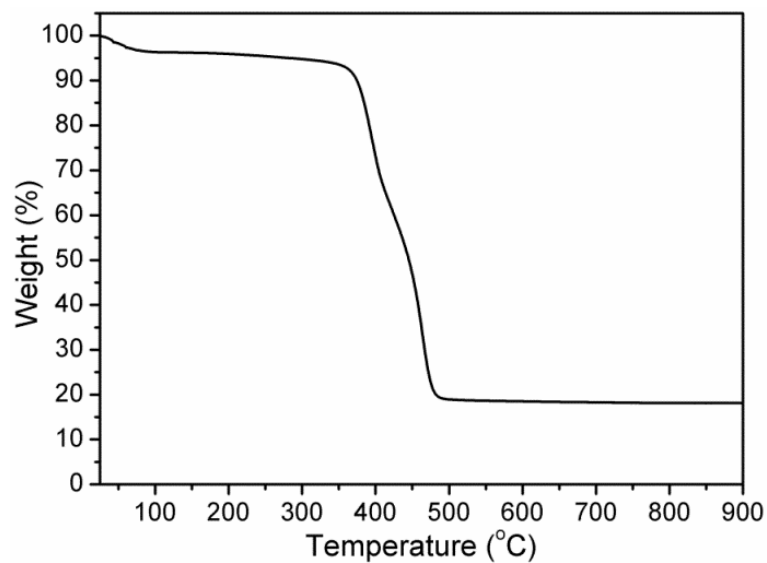

Fig. S3 TG diagram of 1.

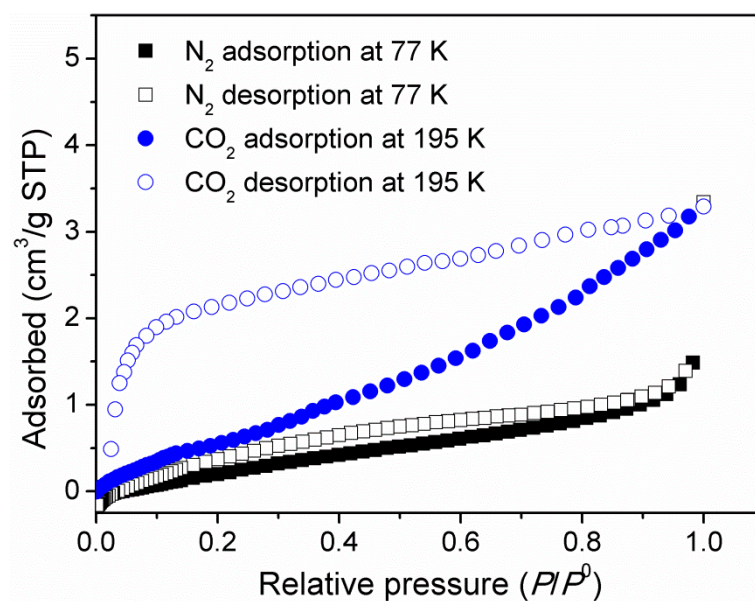

Fig. S4 Low-pressure N<sub>2</sub> and CO<sub>2</sub> adsorption/desorption isotherms of activated 1.

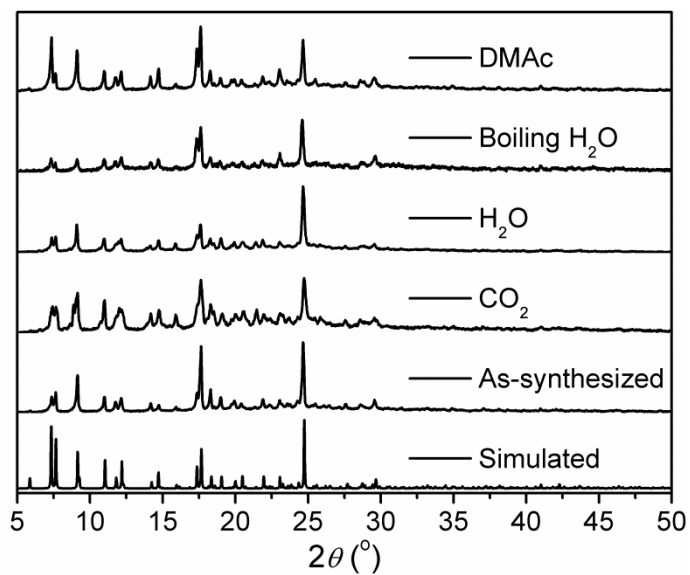

**Fig. S5** XRPD patterns of **1**: simulated, as-synthesized, after CO<sub>2</sub> adsorption, and after immersion in H<sub>2</sub>O, DMAc at room temperature, and boiling H<sub>2</sub>O for 1 day.

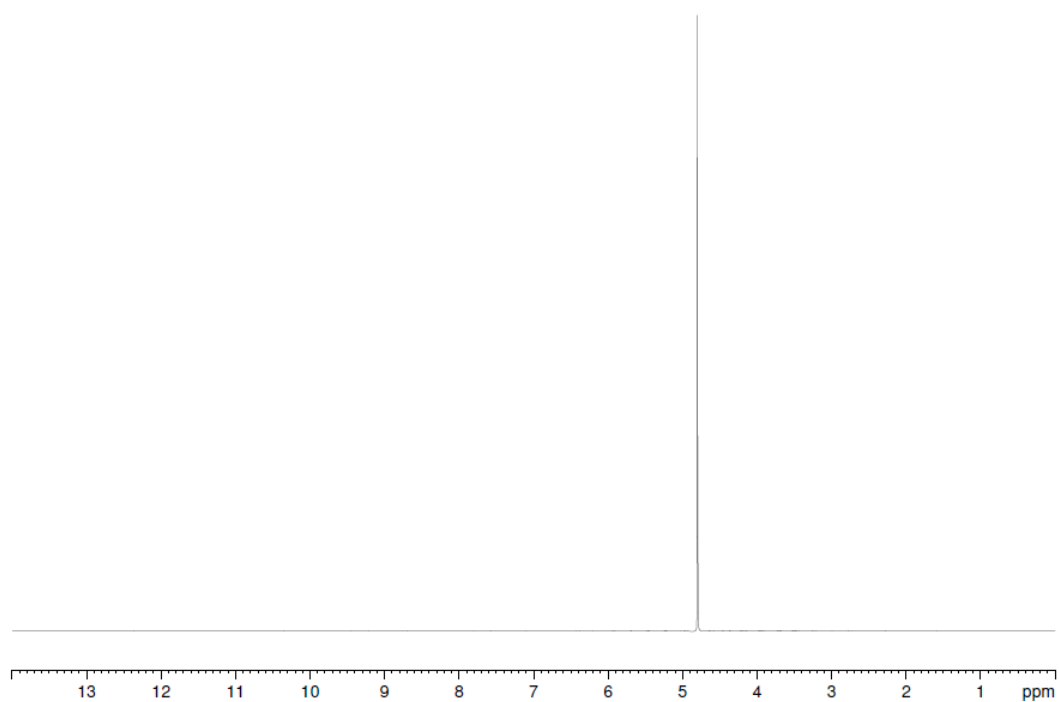

**Fig. S6** <sup>1</sup>H NMR spectrum of the supernatant of **1** dispersed in D<sub>2</sub>O at room temperature for 1 day.

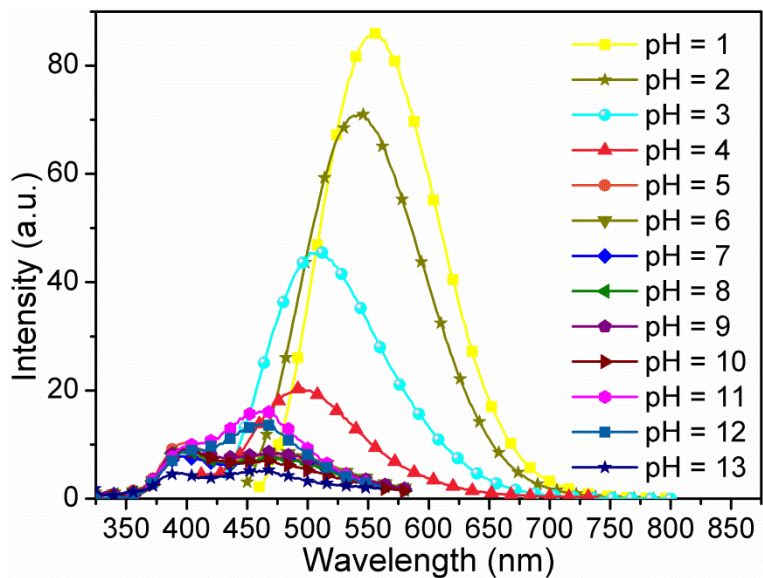

**Fig. S7** Fluorescence emission spectra of Cz-3,6-bpy in different pH aqueous solutions ranging from 1 to 13 upon excitation at 350 nm.

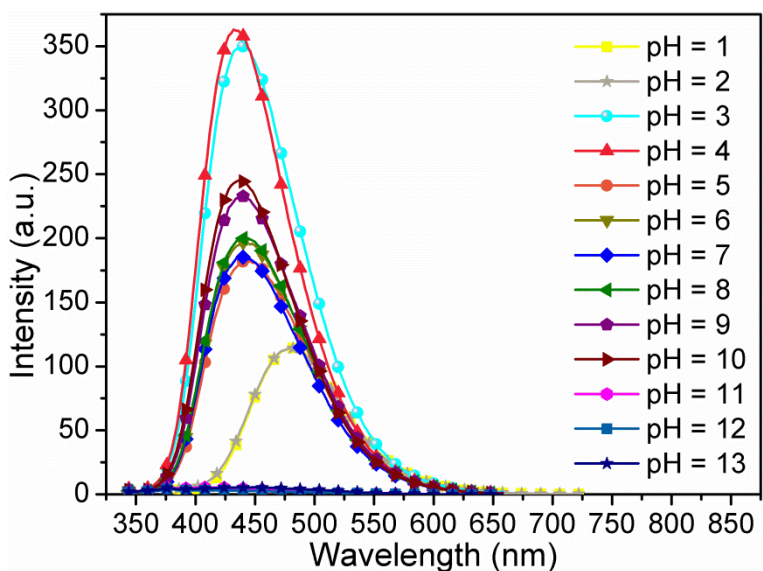

**Fig. S8** Fluorescence emission spectra of 1,4-H<sub>2</sub>ndc in different pH aqueous solutions ranging from 1 to 13 upon excitation at 350 nm.

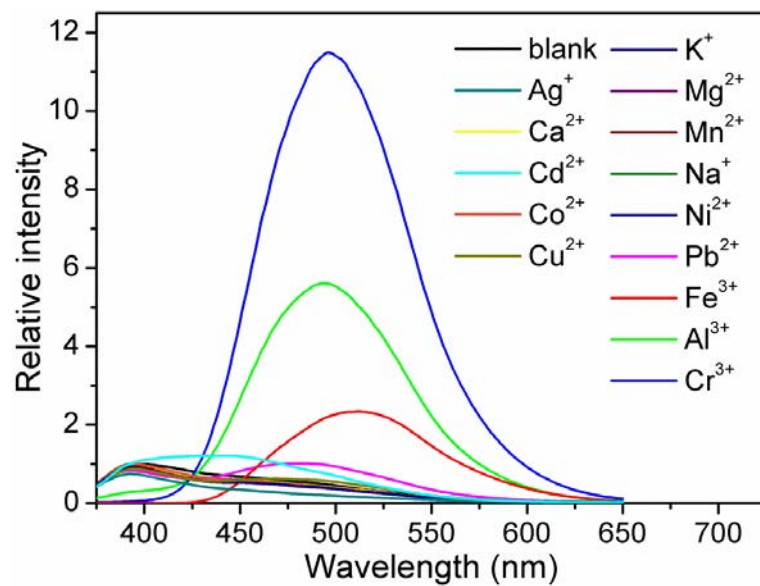

**Fig. S9** Fluorescence spectra of free Cz-3,6-bpy ligand in H<sub>2</sub>O suspension before and after addition of different metal ions at 1.0 mM upon excitation at 350 nm.

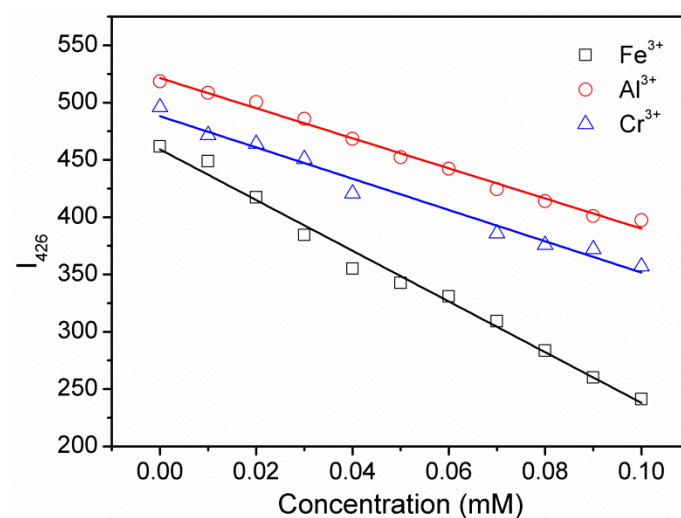

|                                                               | Fe <sup>3+</sup> | Al <sup>3+</sup> | Cr <sup>3+</sup> |
|---------------------------------------------------------------|------------------|------------------|------------------|
| Blank reading 1                                               | 466.3            | 528.0            | 504.0            |
| Blank reading 2                                               | 467.0            | 527.7            | 503.3            |
| Blank reading 3                                               | 467.4            | 519.8            | 498.6            |
| Blank reading 4                                               | 471.2            | 522.6            | 495.9            |
| Blank reading 5                                               | 461.7            | 518.6            | 495.9            |
| <b>Standard deviation (<math>\sigma</math>)</b>               | <b>3.391</b>     | <b>4.367</b>     | <b>3.918</b>     |
| <b>/ Slope / (<math>k</math>), mM<sup>-1</sup></b>            | <b>2212</b>      | <b>1313</b>      | <b>1365</b>      |
| $R^2$                                                         | 0.98868          | 0.99092          | 0.97848          |
| <b>LOD (<math>3\sigma/k</math>), <math>\mu\text{M}</math></b> | <b>4.60</b>      | <b>9.97</b>      | <b>8.61</b>      |

**Fig. S10** Plots of fluorescence intensity of  $\lambda = 426$  nm ( $I_{426}$ ) versus metal ion concentration for **1** suspension in H<sub>2</sub>O at 0–0.10 mM upon excitation at 350 nm. The following table shows the relevant parameters for LOD calculation for **1** suspension in H<sub>2</sub>O toward Fe<sup>3+</sup>, Al<sup>3+</sup>, and Cr<sup>3+</sup> ions.



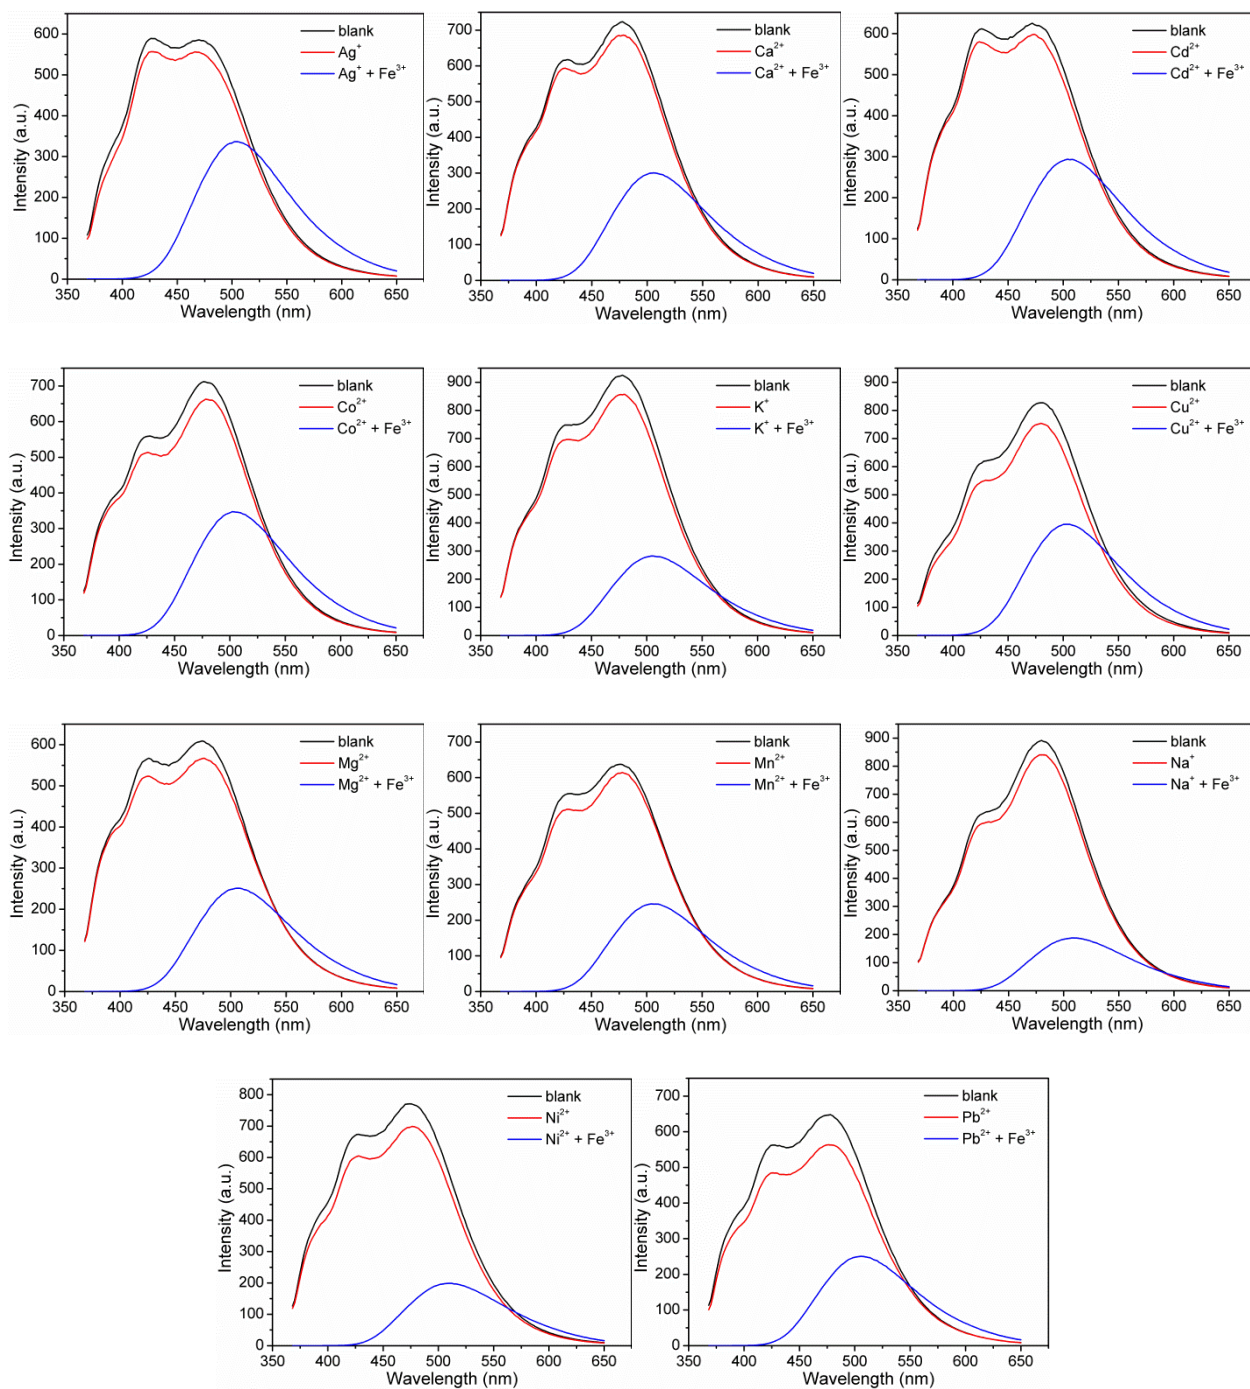

**Fig. S11** Fluorescence spectra of **1** suspension in H<sub>2</sub>O before and after addition of different interfering metal ions at 1.0 mM and the concomitant addition of the same concentration of Fe<sup>3+</sup> upon excitation at 350 nm.



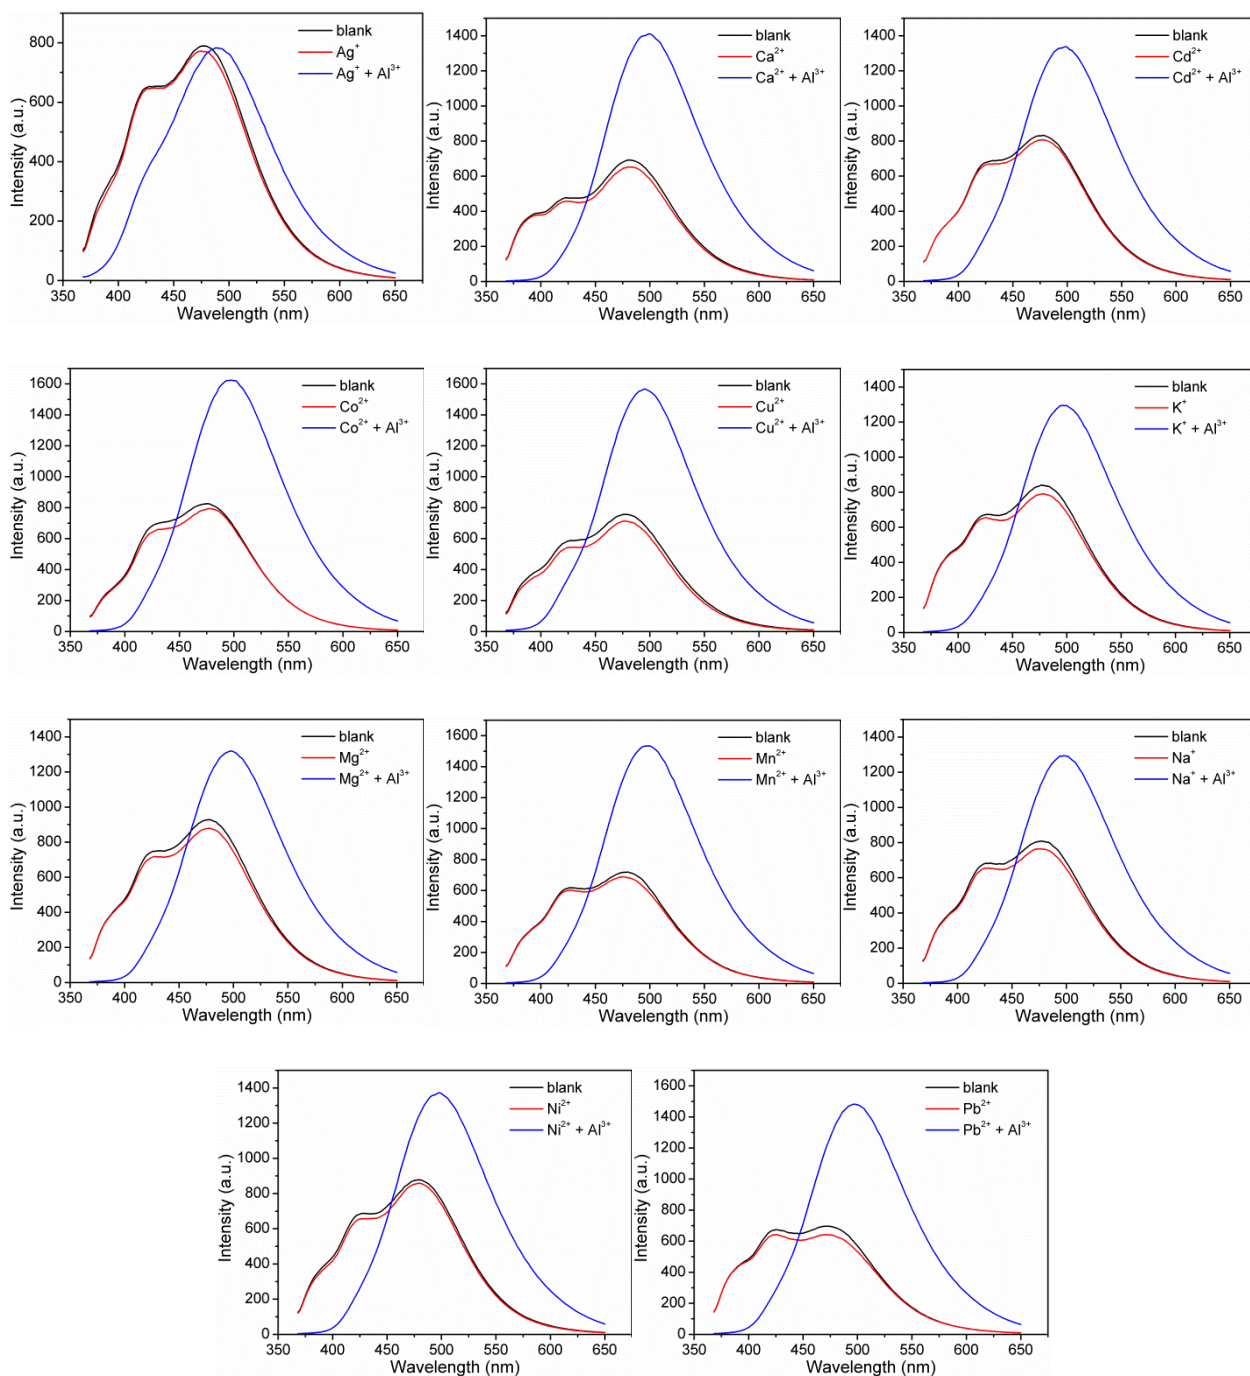

**Fig. S12** Fluorescence spectra of **1** suspension in H<sub>2</sub>O before and after addition of different interfering metal ions at 1.0 mM and the concomitant addition of the same concentration of Al<sup>3+</sup> upon excitation at 350 nm.

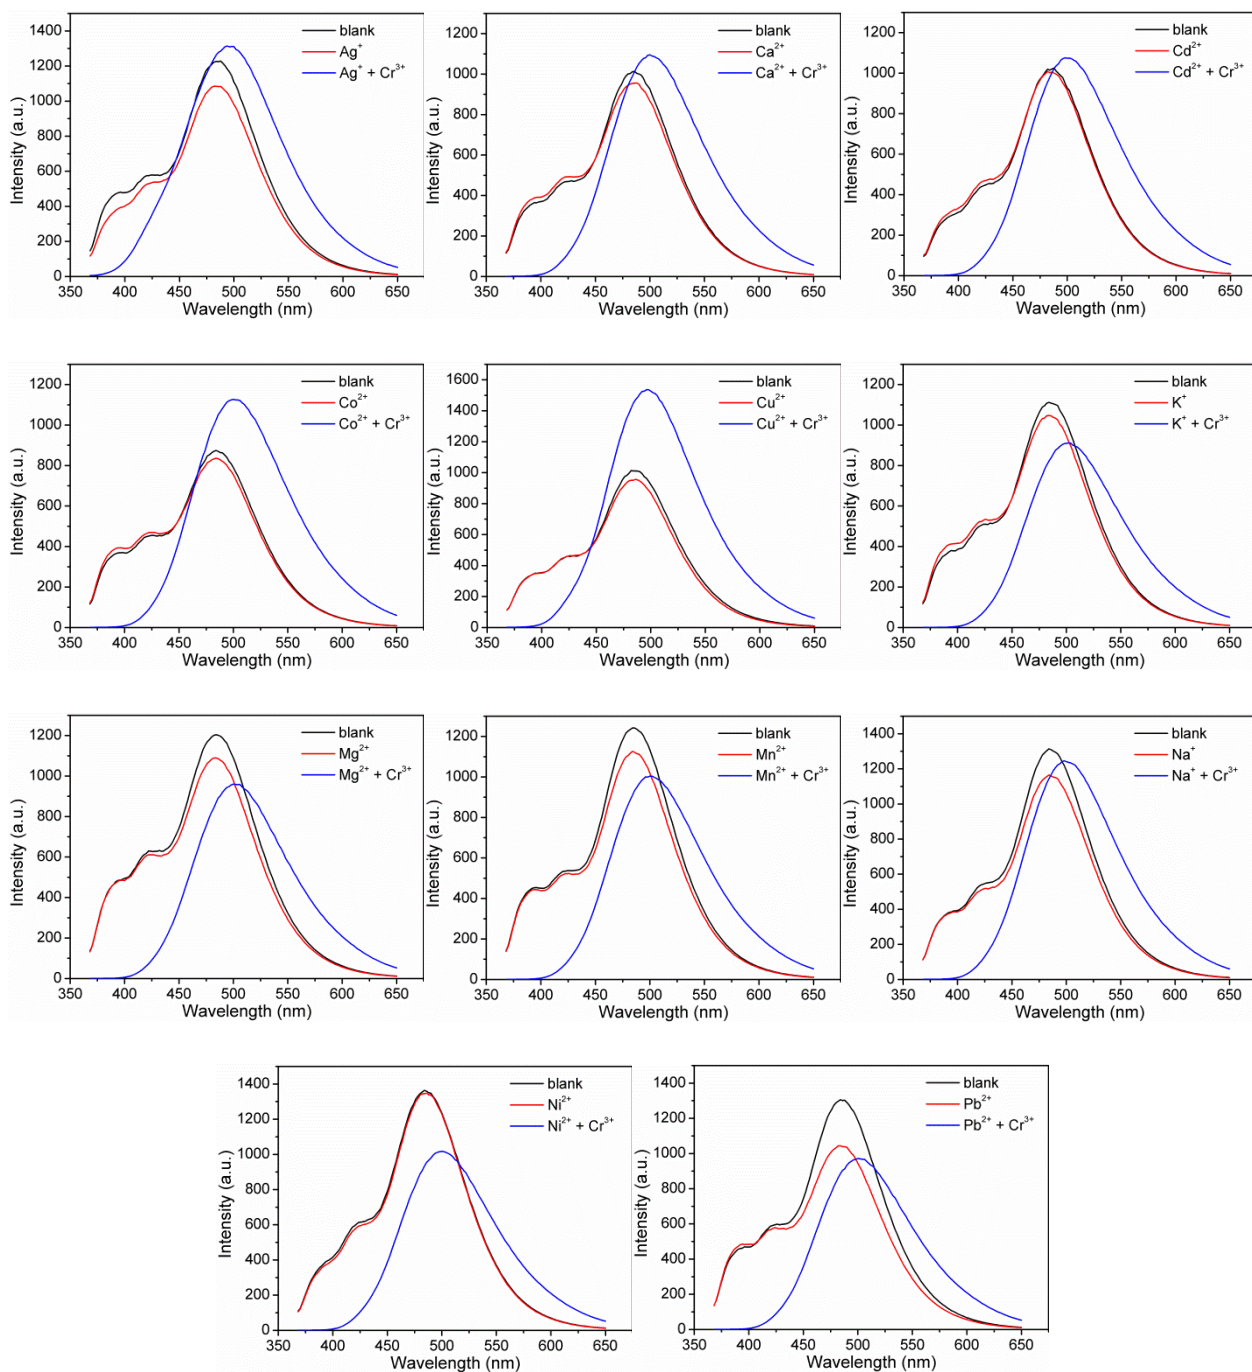

**Fig. S13** Fluorescence spectra of **1** suspension in H<sub>2</sub>O before and after addition of different interfering metal ions at 1.0 mM and the concomitant addition of the same concentration of Cr<sup>3+</sup> upon excitation at 350 nm.

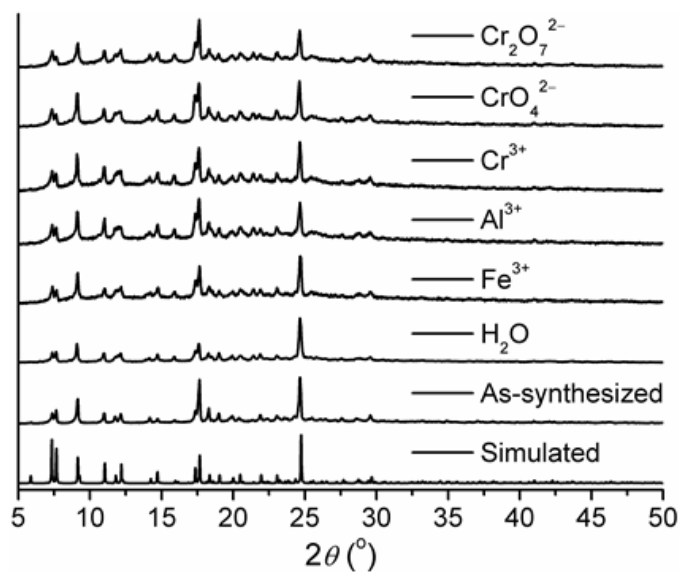

**Fig. S14** XRPD patterns of **1** in various situations: simulated, as-synthesized, after immersion in  $\text{H}_2\text{O}$  for 1 day, and after treated with  $\text{Fe}^{3+}$ ,  $\text{Al}^{3+}$ ,  $\text{Cr}^{3+}$ ,  $\text{CrO}_4^{2-}$ , and  $\text{Cr}_2\text{O}_7^{2-}$  in  $\text{H}_2\text{O}$  for 1 day.

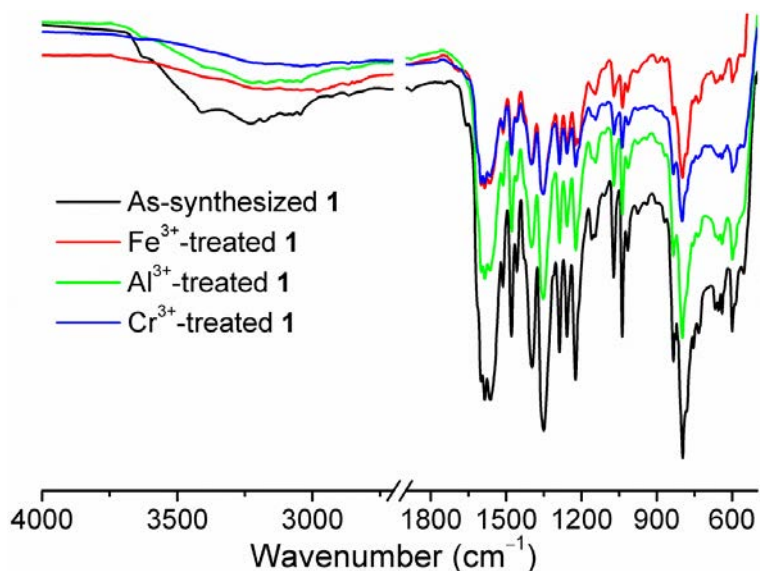

**Fig. S15** IR spectra of **1** before and after treated with  $\text{Fe}^{3+}$ ,  $\text{Al}^{3+}$ , and  $\text{Cr}^{3+}$  in  $\text{H}_2\text{O}$  for 1 day.

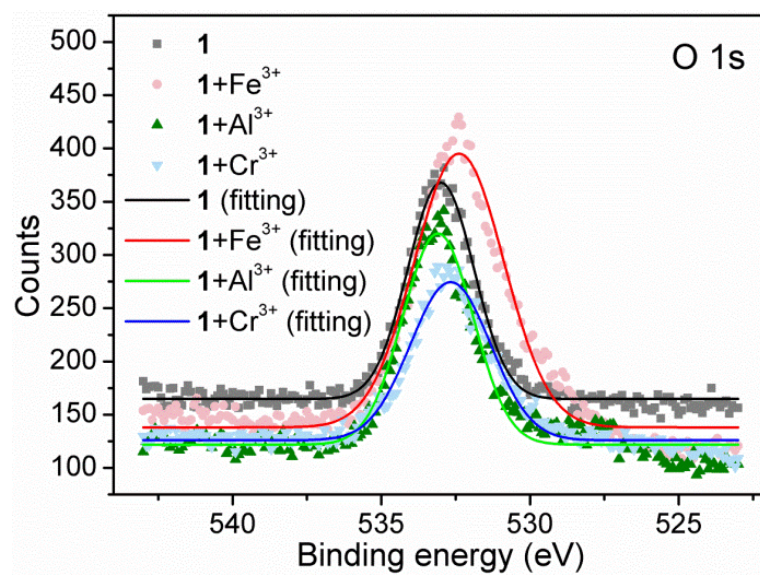

**Fig. S16** O 1s XPS spectra of as-synthesized **1** and Fe<sup>3+</sup>-, Al<sup>3+</sup>-, and Cr<sup>3+</sup>-treated **1**.



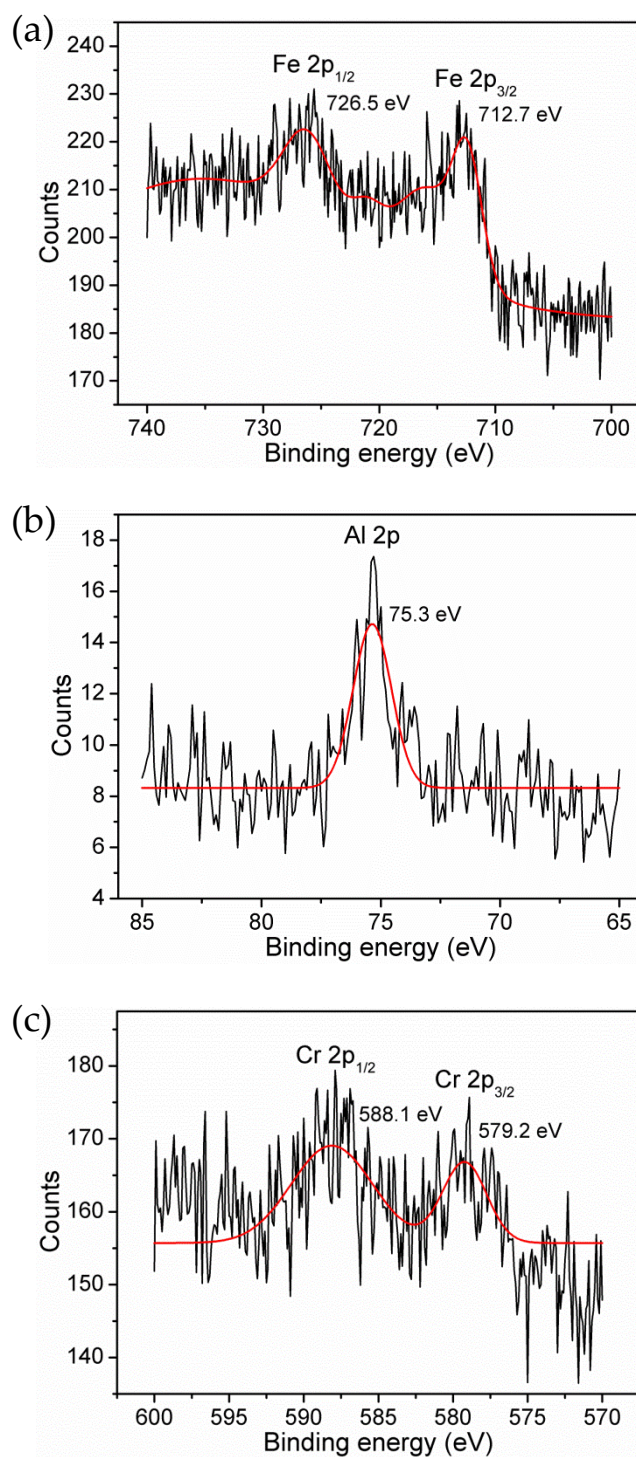

**Fig. S17** (a) Fe 2p (b) Al 2p, and (c) Cr 2p XPS spectra of Fe<sup>3+</sup>-, Al<sup>3+</sup>-, and Cr<sup>3+</sup>-treated **1**, respectively.

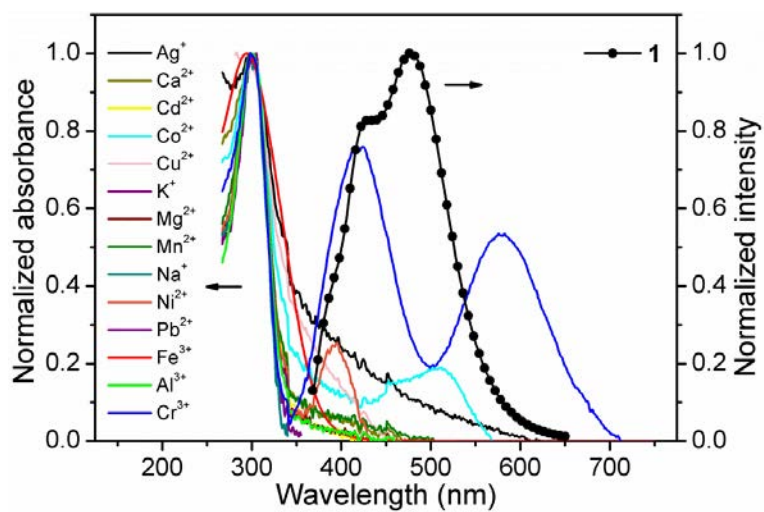

**Fig. S18** Spectra overlap between the normalized absorption spectra of all tested metal ions in aqueous solutions and the normalized emission spectra of **1** suspension in H<sub>2</sub>O upon excitation at 350 nm.

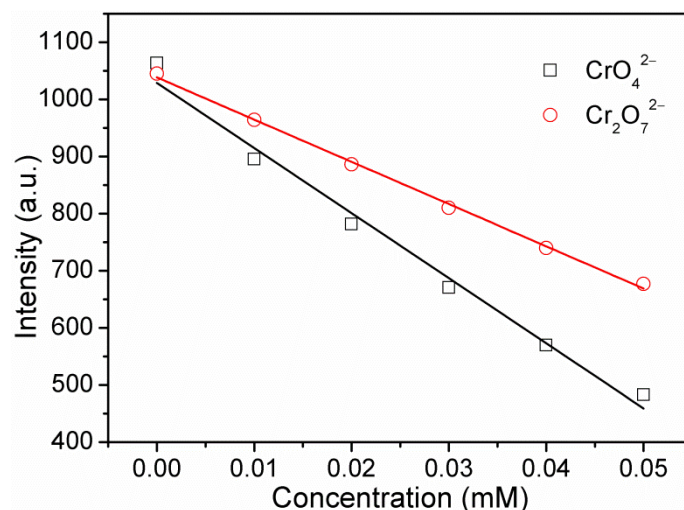

|                                                               | CrO <sub>4</sub> <sup>2-</sup> | Cr <sub>2</sub> O <sub>7</sub> <sup>2-</sup> |
|---------------------------------------------------------------|--------------------------------|----------------------------------------------|
| Blank reading 1                                               | 1061                           | 1051                                         |
| Blank reading 2                                               | 1067                           | 1050                                         |
| Blank reading 3                                               | 1063                           | 1039                                         |
| Blank reading 4                                               | 1068                           | 1044                                         |
| Blank reading 5                                               | 1058                           | 1045                                         |
| <b>Standard deviation (<math>\sigma</math>)</b>               | <b>4.159</b>                   | <b>4.354</b>                                 |
| <b>/ Slope / (<math>k</math>), mM<sup>-1</sup></b>            | <b>11394</b>                   | <b>7388</b>                                  |
| $R^2$                                                         | 0.98478                        | 0.99757                                      |
| <b>LOD (<math>3\sigma/k</math>), <math>\mu\text{M}</math></b> | <b>1.10</b>                    | <b>1.77</b>                                  |

**Fig. S19** Plots of fluorescence intensity versus anion concentration for **1** suspension in H<sub>2</sub>O at 0–0.05 mM upon excitation at 350 nm. The following table shows the relevant parameters for LOD calculation for **1** suspension in H<sub>2</sub>O toward CrO<sub>4</sub><sup>2-</sup> and Cr<sub>2</sub>O<sub>7</sub><sup>2-</sup> ions.



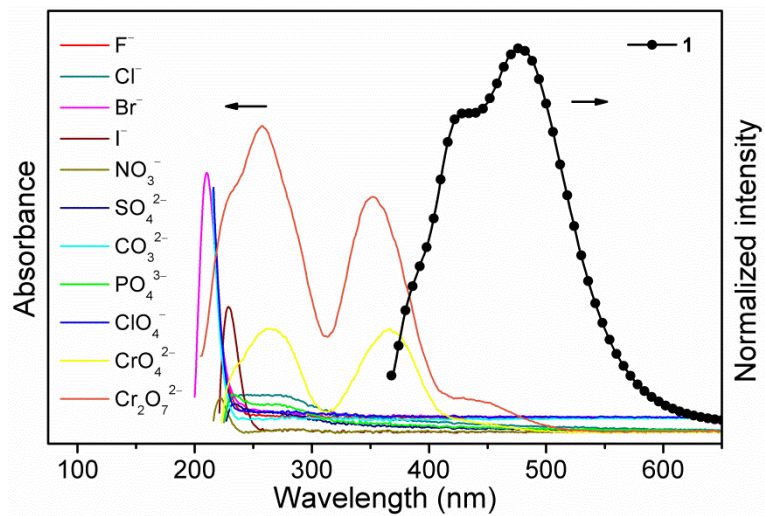

**Fig. S20** Spectra overlap between the absorption spectra of all tested anions in aqueous solutions and the normalized emission spectra of **1** suspension in H<sub>2</sub>O upon excitation at 350 nm.

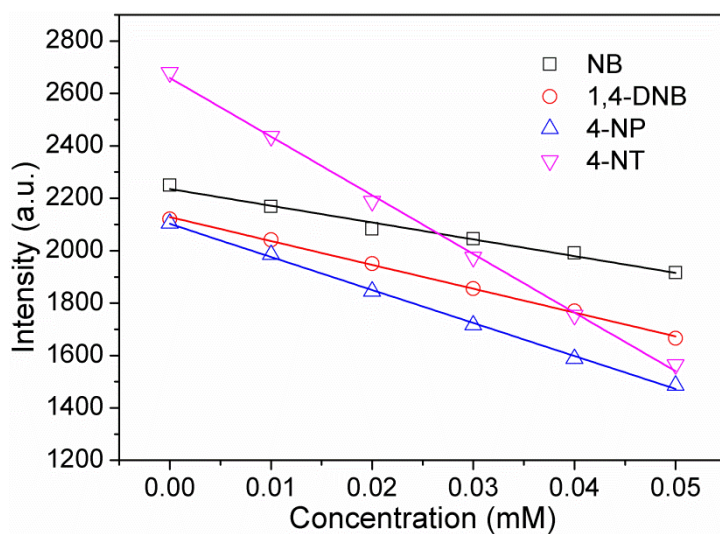

|                                                                | NB           | 1,4-DNB      | 4-NP         | 4-NT         |
|----------------------------------------------------------------|--------------|--------------|--------------|--------------|
| Blank reading 1                                                | 2258         | 2128         | 2100         | 2680         |
| Blank reading 2                                                | 2255         | 2123         | 2098         | 2679         |
| Blank reading 3                                                | 2252         | 2126         | 2104         | 2684         |
| Blank reading 4                                                | 2250         | 2121         | 2098         | 2688         |
| Blank reading 5                                                | 2250         | 2121         | 2098         | 2682         |
| <b>Standard deviation (<math>\sigma</math>)</b>                | <b>3.464</b> | <b>3.114</b> | <b>2.608</b> | <b>3.578</b> |
| <b>/ Slope / (<math>k</math>), <math>\text{mM}^{-1}</math></b> | <b>6397</b>  | <b>9097</b>  | <b>12600</b> | <b>22382</b> |
| $R^2$                                                          | 0.98351      | 0.99849      | 0.99789      | 0.99734      |
| <b>LOD (<math>3\sigma/k</math>), <math>\mu\text{M}</math></b>  | <b>1.62</b>  | <b>1.03</b>  | <b>0.62</b>  | <b>0.48</b>  |

**Fig. S21** Plots of fluorescence intensity versus nitroaromatic concentration for **1** suspension in DMAc at 0–0.05 mM upon excitation at 295 nm. The following table shows the relevant parameters for LOD calculation for **1** suspension in DMAc toward various nitroaromatic analytes.

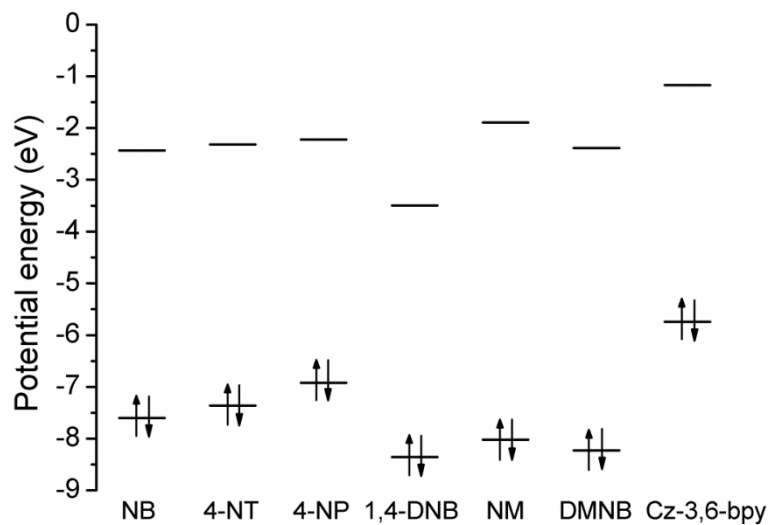

**Fig. S22** HOMO and LUMO energies for nitro analytes and Cz-3,6-bpy.

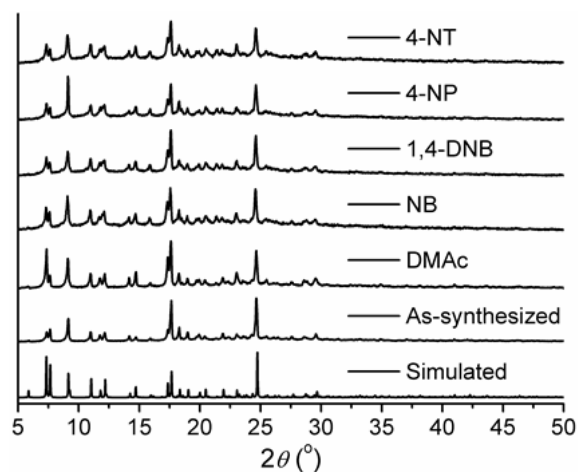

**Fig. S23** XRPD patterns of **1** in various situations: simulated, as-synthesized, after immersion in DMAc for 1 day, and after treated with NB, 1,4-DNB, 4-NP, and 4-NT in DMAc for 1 day.

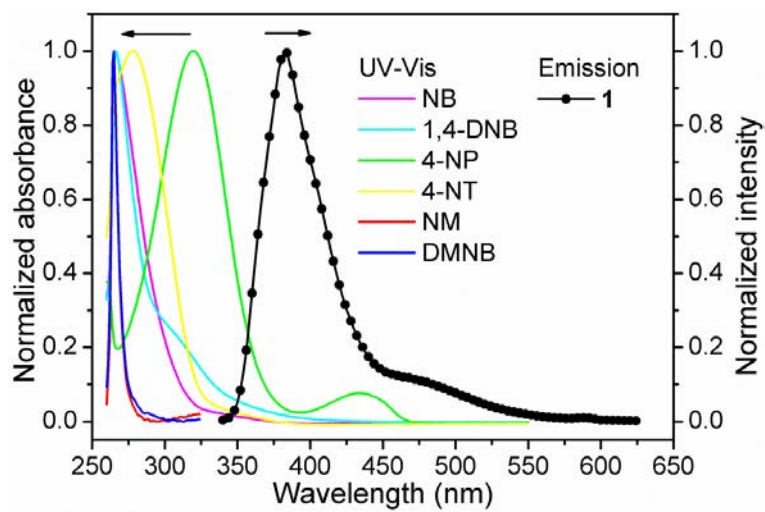

**Fig. S24** Spectra overlap between the normalized absorption spectra of all tested nitro compounds in DMAc solutions and the normalized emission spectra of **1** suspension in DMAc upon excitation at 295 nm.
